# Supplementary material for: Reproducibility of a Short-Form, Multicomponent Dietary Questionnaire to Assess Food Frequency Consumption, Nutrition Knowledge, and Lifestyle (SF-FFQ4PolishChildren) in Polish Children and Adolescents
Source: MDPI journal article supplement (doi:10.3390/nu11122929), 2019-12-03
Supplement: s1 [file s1]

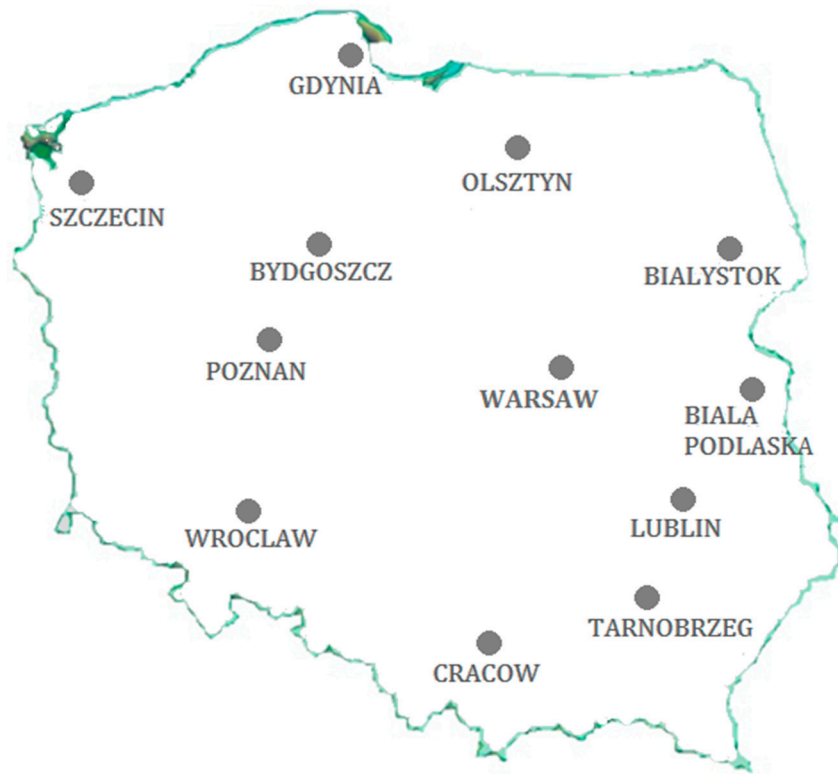

**Figure S1.** The academic centres (including cities and villages around) where data were collected [22].

**Table S1.** Correlation coefficients ( $r$ )<sup>1</sup> between test and retest of the SF-FFQ4PolishChildren questionnaire by sex and place of residence.

| Variables<br>(all in points)           | Range<br>of points | Children<br>aged 6-10<br>years<br>( $n = 437$ ) | Adolescents aged 11-15 years<br>( $n = 630$ ) |                                       |
|----------------------------------------|--------------------|-------------------------------------------------|-----------------------------------------------|---------------------------------------|
|                                        |                    | Parent<br>(test-retest)                         | Adolescent<br>(test-retest)                   | Adolescent (test)<br>& Parent (testP) |
| Boys                                   |                    |                                                 |                                               |                                       |
| Nutrition knowledge score <sub>2</sub> | 0–18               | 0.81                                            | 0.66                                          | NA                                    |
| pHDI                                   | 0–100              | 0.75                                            | 0.60                                          | 0.52                                  |
| nHDI                                   | 0–100              | 0.81                                            | 0.68                                          | 0.48                                  |
| Screen time score                      | 0–5                | 0.77                                            | 0.53                                          | 0.36                                  |
| Physical activity score                | 0–5                | 0.74                                            | 0.69                                          | 0.51                                  |
| FAS                                    | 0–9                | 0.91                                            | 0.90                                          | 0.87                                  |
| Girls                                  |                    |                                                 |                                               |                                       |
| Nutrition knowledge score <sub>2</sub> | 0–18               | 0.80                                            | 0.70                                          | NA                                    |
| pHDI                                   | 0–100              | 0.76                                            | 0.66                                          | 0.51                                  |
| nHDI                                   | 0–100              | 0.83                                            | 0.67                                          | 0.57                                  |
| Screen time score                      | 0–5                | 0.78                                            | 0.62                                          | 0.54                                  |
| Physical activity score                | 0–5                | 0.79                                            | 0.73                                          | 0.52                                  |
| FAS                                    | 0–9                | 0.94                                            | 0.92                                          | 0.92                                  |
| Rural residents                        |                    |                                                 |                                               |                                       |
| Nutrition knowledge score <sub>2</sub> | 0–18               | 0.85                                            | 0.64                                          | NA                                    |
| pHDI                                   | 0–100              | 0.78                                            | 0.61                                          | 0.57                                  |
| nHDI                                   | 0–100              | 0.84                                            | 0.62                                          | 0.60                                  |
| Screen time score                      | 0–5                | 0.76                                            | 0.55                                          | 0.50                                  |
| Physical activity score                | 0–5                | 0.76                                            | 0.69                                          | 0.51                                  |
| FAS                                    | 0–9                | 0.89                                            | 0.83                                          | 0.88                                  |
| Urban residents <sup>3</sup>           |                    |                                                 |                                               |                                       |
| Nutrition knowledge score <sub>2</sub> | 0–18               | 0.75                                            | 0.72                                          | NA                                    |
| pHDI                                   | 0–100              | 0.72                                            | 0.65                                          | 0.47                                  |
| nHDI                                   | 0–100              | 0.81                                            | 0.73                                          | 0.46                                  |
| Screen time score                      | 0–5                | 0.80                                            | 0.60                                          | 0.41                                  |
| Physical activity score                | 0–5                | 0.79                                            | 0.72                                          | 0.52                                  |
| FAS                                    | 0–9                | 0.96                                            | 0.95                                          | 0.88                                  |

<sup>1</sup>  $r$ —the Spearman's rank correlation coefficient (all  $<0.05$ ); nutrition knowledge score—evaluated based on 18 questions [22]; <sup>2</sup> in a group of 6-10-year-old children nutrition knowledge was assessed in their parents; pHDI—a pro-Healthy Diet Index composed of 4 questions (dairy products, fish, vegetables, fruit) [22]; nHDI—a non-Healthy Diet Index composed of 4 questions (fast food, sweetened soft drinks, energy drinks, sweets) [22]; screen time score—based on a single questions with 6 response categories [22]; physical activity score—based on two questions: physical activity at school and physical activity at leisure time [22]; FAS—the Family Affluence Scale composed of 6 questions [26]; <sup>3</sup> urban residents—respondents who indicated one of the following categories of place of residence: 'town' or 'city ( $\geq 100\ 000$  inhabitants)'; NA—not applied.

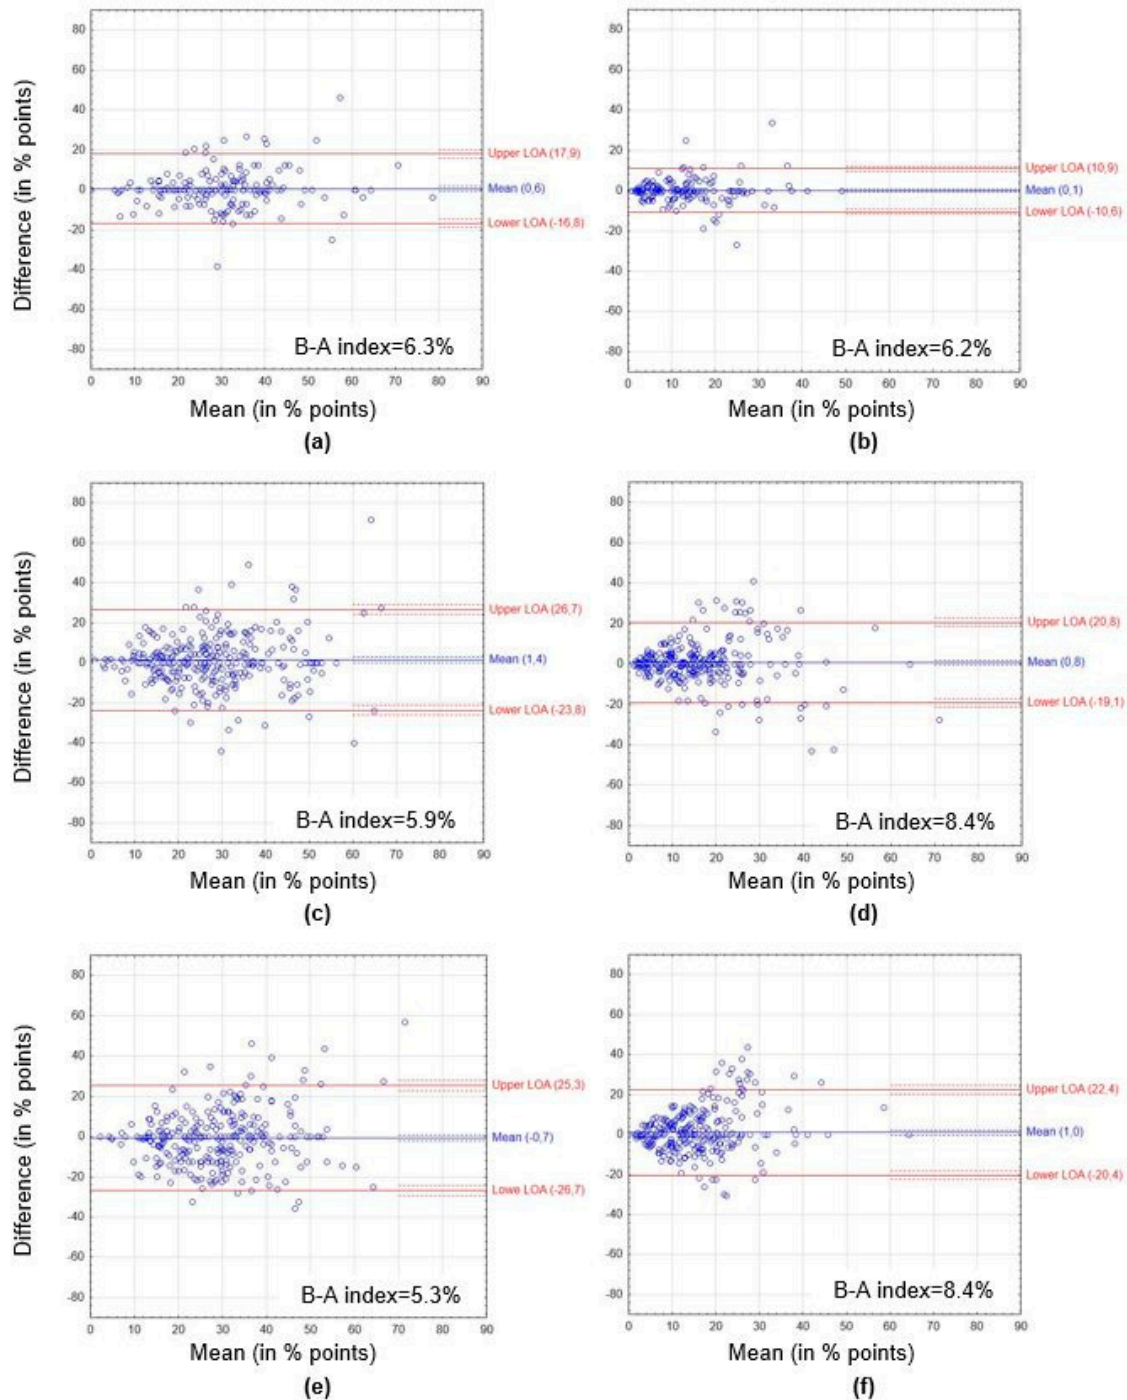

**Figure S2.** Boys: Bland-Altman plots for the pro-Healthy-Diet-Index (pHDI; left panel) and the non-Healthy-Diet-Index (nHDI; right panel) between the first and the second administration of the questionnaire: (a) pHDI in children aged 6-10 years (test and retest), (b) nHDI in children aged 6-10 years (test and retest), (c) pHDI in adolescents aged 11-15 years (test and retest), (d) nHDI in adolescents aged 11-15 years (test and retest), (e) pHDI in adolescents aged 11-15 years and their parents (test and testP), (f) nHDI in adolescents aged 11-15 years and their parents (test and testP). Mean—mean difference between the first and the second administration of the questionnaire (blue solid line) with 95% CI (dashed lines). LOA—95% limits of agreement between the first and the second administration of the questionnaire (red solid lines) with 95% CI (dashed lines). B-A index—the Bland-Altman index calculated as percentage of respondents beyond LOA. .

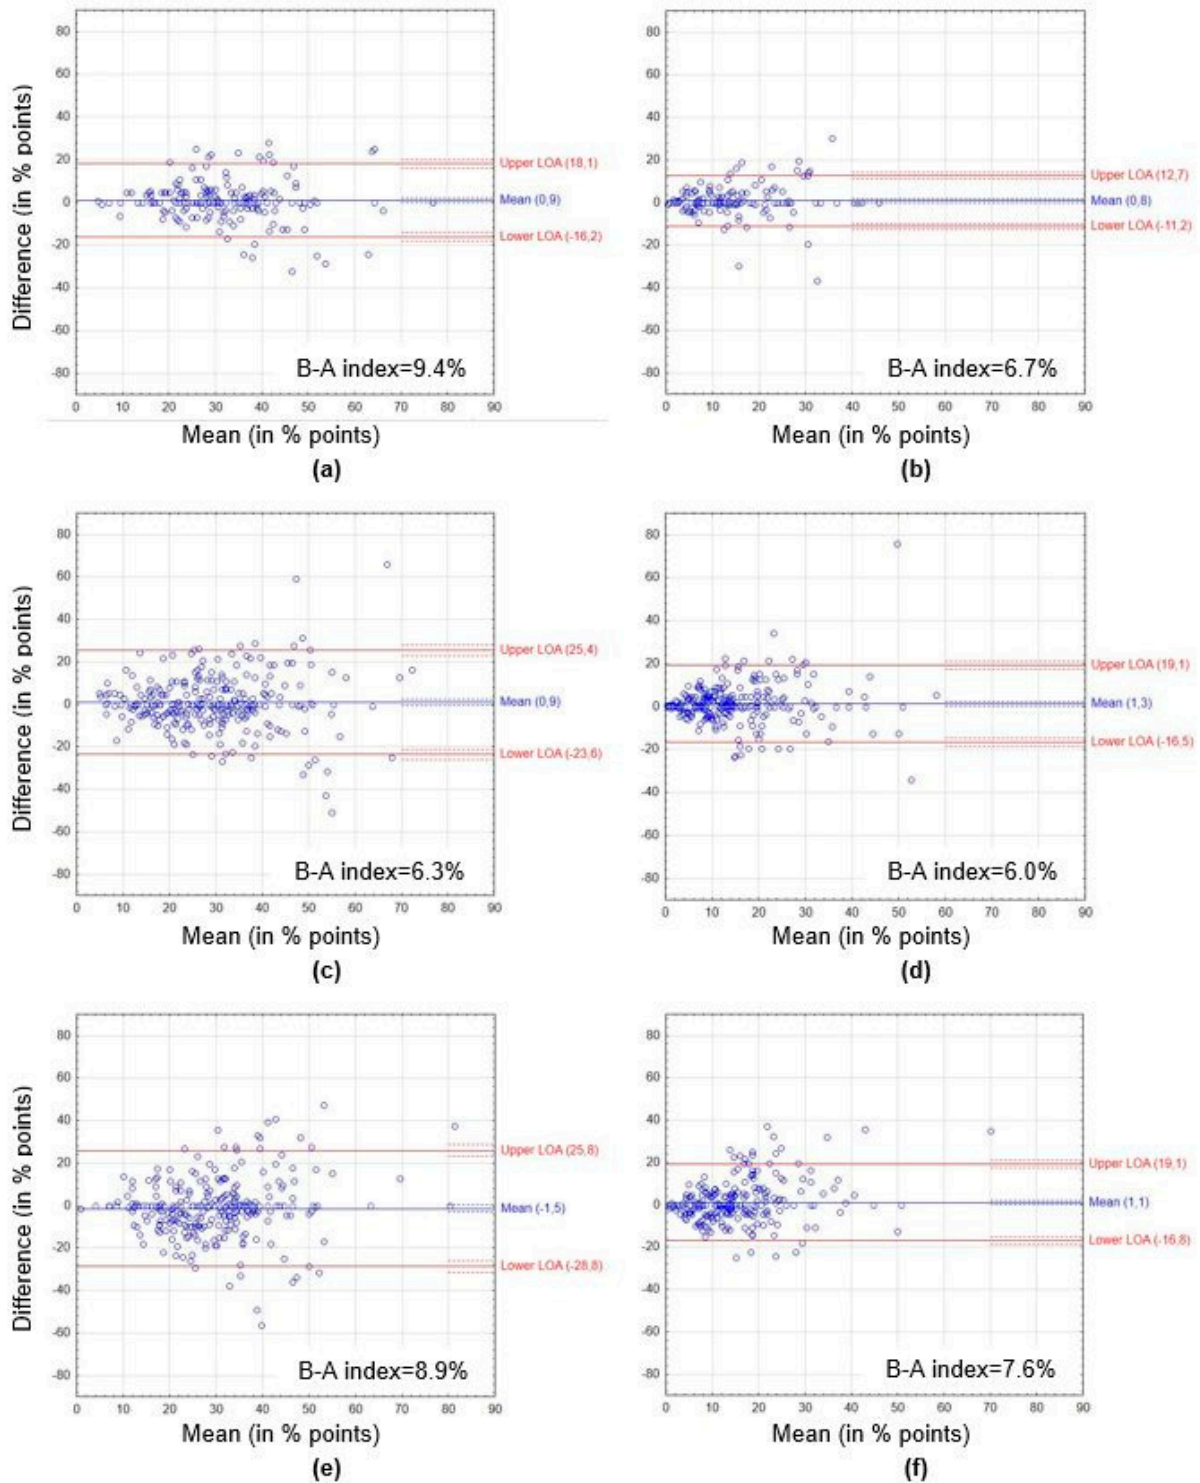

**Figure S3.** Girls: Bland-Altman plots for the pro-Healthy-Diet-Index (pHDI; left panel) and the non-Healthy-Diet-Index (nHDI; right panel) between the first and the second administration of the questionnaire: (a) pHDI in children aged 6-10 years (test and retest), (b) nHDI in children aged 6-10 years (test and retest), (c) pHDI in adolescents aged 11-15 years (test and retest), (d) nHDI in adolescents aged 11-15 years (test and retest), (e) pHDI in adolescents aged 11-15 years and their parents (test and testP), (f) nHDI in adolescents aged 11-15 years and their parents (test and testP). Mean—mean difference between the first and the second administration of the questionnaire (blue solid line) with 95% CI (dashed lines). LOA—95% limits of agreement between the first and the second

administration of the questionnaire (red solid lines) with 95% CI (dashed lines). B-A index—the Bland-Altman index calculated as percentage of respondents beyond LOA. .

**Table S2.** Means and 95% confidence interval (CI) in test and retest of the SF-FFQ4PolishChildren questionnaire in the total sample and by sex and place of residence.

| Variables<br>(all in points)           | Range<br>of<br>point<br>s | Children aged 6-10 years<br>(n = 437) |                      |                       | Adolescents aged 11-15 years<br>(n = 630) |                        |                       |                   |                       |
|----------------------------------------|---------------------------|---------------------------------------|----------------------|-----------------------|-------------------------------------------|------------------------|-----------------------|-------------------|-----------------------|
|                                        |                           | Test<br>(parent)                      | Retest<br>(parent)   | <i>P</i> <sup>1</sup> | Test<br>(adolescent)                      | Retest<br>(adolescent) | <i>P</i> <sup>1</sup> | TestP (parent)    | <i>P</i> <sup>1</sup> |
| Total sample                           |                           |                                       |                      |                       |                                           |                        |                       |                   |                       |
| Nutrition knowledge score <sup>2</sup> | 0-18                      | 10.4 (10.1;<br>10.6)                  | 10.4 (10.1;<br>10.6) | ns                    | 7.2 (6.9; 7.4)                            | 7.5 (7.3; 7.7)         | **                    | NA                |                       |
| pHDI                                   | 0-100                     | 31.5 (30.3;<br>32.8)                  | 30.8 (29.6;<br>32.0) | ns                    | 29.0 (27.9;<br>30.1)                      | 27.8 (26.7;<br>28.9)   | *                     | 30.2 (29.1; 31.2) | **                    |
| nHDI                                   | 0-100                     | 13.0 (12.2;<br>13.9)                  | 12.6 (11.7;<br>13.4) | *                     | 15.1 (14.2;<br>16.0)                      | 14.0 (13.1;<br>14.9)   | **                    | 14.0 (13.2; 14.7) | ns                    |
| Screen time score                      | 0-5                       | 0.4 (0.4; 0.5)                        | 0.5 (0.4; 0.5)       | ns                    | 0.9 (0.8; 1.0)                            | 1.0 (0.9; 1.1)         | *                     | 0.7 (0.6; 0.8)    | ****                  |
| Physical activity score                | 0-5                       | 3.2 (3.0; 3.3)                        | 3.1 (3.0; 3.2)       | ns                    | 3.4 (3.3; 3.5)                            | 3.3 (3.2; 3.4)         | ns                    | 3.0 (2.9; 3.1)    | ****                  |
| FAS                                    | 0-9                       | 6.2 (6.0; 6.4)                        | 6.2 (6.0; 6.4)       | ns                    | 6.8 (6.7; 6.9)                            | 6.8 (6.6; 6.9)         | ns                    | 6.6 (6.5; 6.8)    | ***                   |
| Boys                                   |                           |                                       |                      |                       |                                           |                        |                       |                   |                       |
| Nutrition knowledge score <sup>2</sup> | 0-18                      | 10.5 (10.1;<br>10.8)                  | 10.6 (10.2;<br>10.9) | ns                    | 6.9 (6.6; 7.2)                            | 7.1 (6.7; 7.5)         | ns                    | NA                |                       |
| pHDI                                   | 0-100                     | 30.5 (28.7;<br>32.4)                  | 30.0 (28.3;<br>31.7) | ns                    | 28.4 (26.8;<br>29.9)                      | 26.9 (25.5;<br>28.4)   | *                     | 29.1 (27.8; 30.5) | ns                    |
| nHDI                                   | 0-100                     | 12.6 (11.4;<br>13.8)                  | 12.5 (11.3;<br>13.6) | ns                    | 15.5 (14.2;<br>16.8)                      | 14.7 (13.4;<br>16.0)   | ns                    | 14.5 (13.4; 15.5) | ns                    |
| Screen time score                      | 0-5                       | 0.4 (0.3; 0.5)                        | 0.4 (0.4; 0.5)       | ns                    | 1.0 (0.9; 1.1)                            | 1.1 (0.9; 1.2)         | ns                    | 0.7 (0.7; 0.8)    | ***                   |
| Physical activity score                | 0-5                       | 3.4 (3.2; 3.6)                        | 3.3 (3.1; 3.4)       | *                     | 3.4 (3.3; 3.6)                            | 3.3 (3.1; 3.4)         | *                     | 3.0 (2.9; 3.2)    | ****                  |
| FAS                                    | 0-9                       | 6.4 (6.2; 6.7)                        | 6.4 (6.2; 6.7)       | ns                    | 6.8 (6.7; 7.0)                            | 6.8 (6.6; 7.0)         | ns                    | 6.6 (6.4; 6.8)    | ***                   |
| Girls                                  |                           |                                       |                      |                       |                                           |                        |                       |                   |                       |
| Nutrition knowledge score <sup>2</sup> | 0-18                      | 10.3 (9.9; 10.6)                      | 10.2 (9.8; 10.6)     | ns                    | 7.5 (7.1; 7.8)                            | 7.9 (7.6; 8.2)         | *                     | NA                |                       |
| pHDI                                   | 0-100                     | 32.5 (30.9;<br>34.1)                  | 31.6 (29.9;<br>33.2) | ns                    | 29.7 (28.1;<br>31.3)                      | 28.8 (27.2;<br>30.3)   | ns                    | 31.3 (29.8; 32.8) | *                     |
| nHDI                                   | 0-100                     | 13.4 (12.1;<br>14.7)                  | 12.7 (11.5;<br>13.9) | **                    | 14.6 (13.3;<br>15.9)                      | 13.3 (12.1;<br>14.5)   | **                    | 13.4 (12.4; 14.5) | ns                    |
| Screen time score                      | 0-5                       | 0.5 (0.4; 0.5)                        | 0.5 (0.4; 0.6)       | ns                    | 0.8 (0.7; 0.9)                            | 0.9 (0.8; 1.0)         | *                     | 0.6 (0.5; 0.7)    | ***                   |

| Variables<br>(all in points)           | Range<br>of<br>point<br>s | Children aged 6-10 years<br>(n = 437) |                      |                | Adolescents aged 11-15 years<br>(n = 630) |                        |                |                   |                |
|----------------------------------------|---------------------------|---------------------------------------|----------------------|----------------|-------------------------------------------|------------------------|----------------|-------------------|----------------|
|                                        |                           | Test<br>(parent)                      | Retest<br>(parent)   | P <sup>1</sup> | Test<br>(adolescent)                      | Retest<br>(adolescent) | P <sup>1</sup> | TestP (parent)    | P <sup>1</sup> |
| Physical activity score                | 0-5                       | 2.9 (2.7; 3.1)                        | 2.9 (2.7; 3.1)       | ns             | 3.3 (3.2; 3.5)                            | 3.3 (3.2; 3.5)         | ns             | 3.0 (2.8; 3.1)    | ****           |
| FAS                                    | 0-9                       | 6.0 (5.7; 6.2)                        | 6.0 (5.8; 6.2)       | ns             | 6.7 (6.5; 6.9)                            | 6.7 (6.5; 6.9)         | ns             | 6.6 (6.4; 6.8)    | ns             |
| Rural residents                        |                           |                                       |                      |                |                                           |                        |                |                   |                |
| Nutrition knowledge score <sup>2</sup> | 0-18                      | 10.2 (9.8; 10.6)                      | 10.0 (9.6; 10.4)     | ns             | 7.2 (6.9; 7.5)                            | 7.1 (6.7; 7.5)         | ns             | NA                |                |
| pHDI                                   | 0-100                     | 31.7 (29.9;<br>33.5)                  | 31.3 (29.5;<br>33.0) | ns             | 29.5 (28.0;<br>31.1)                      | 27.3 (25.8;<br>28.8)   | ***            | 30.0 (28.4; 31.7) | ns             |
| nHDI                                   | 0-100                     | 14.3 (12.9;<br>15.7)                  | 13.7 (12.4;<br>15.0) | ns             | 15.2 (14.0;<br>16.5)                      | 15.0 (13.6;<br>16.4)   | ns             | 14.6 (13.4; 15.7) | ns             |
| Screen time score                      | 0-5                       | 0.4 (0.4; 0.5)                        | 0.5 (0.4; 0.6)       | ns             | 0.9 (0.8; 1.0)                            | 1.0 (0.9; 1.2)         | ns             | 0.7 (0.6; 0.8)    | ***            |
| Physical activity score                | 0-5                       | 3.1 (2.9; 3.3)                        | 3.0 (2.8; 3.2)       | *              | 3.4 (3.3; 3.6)                            | 3.3 (3.1; 3.4)         | *              | 3.0 (2.8; 3.1)    | ****           |
| FAS                                    | 0-9                       | 6.6 (6.4; 6.9)                        | 6.6 (6.3; 6.8)       | ns             | 7.3 (7.1; 7.5)                            | 7.2 (7.1; 7.4)         | ns             | 7.2 (7.0; 7.4)    | ns             |
| Urban residents <sup>3</sup>           |                           |                                       |                      |                |                                           |                        |                |                   |                |
| Nutrition knowledge score <sup>2</sup> | 0-18                      | 10.5 (10.1;<br>10.9)                  | 10.8 (10.4;<br>11.1) | *              | 7.1 (6.8; 7.5)                            | 7.8 (7.5; 8.1)         | ****           | NA                |                |
| pHDI                                   | 0-100                     | 31.3 (29.7;<br>33.0)                  | 30.3 (28.7;<br>31.9) | ns             | 28.5 (27.0;<br>30.1)                      | 28.3 (26.8;<br>29.8)   | ns             | 30.3 (29.0; 31.6) | **             |
| nHDI                                   | 0-100                     | 11.6 (10.6;<br>12.6)                  | 11.3 (10.2;<br>12.3) | ns             | 14.9 (13.6;<br>16.2)                      | 13.1 (12.0;<br>14.3)   | **             | 13.4 (12.5; 14.4) | ns             |
| Screen time score                      | 0-5                       | 0.4 (0.3; 0.5)                        | 0.4 (0.3; 0.5)       | ns             | 0.9 (0.8; 1.0)                            | 0.9 (0.8; 1.1)         | ns             | 0.6 (0.6; 0.7)    | ***            |
| Physical activity score                | 0-5                       | 3.2 (3.0; 3.4)                        | 3.2 (3.0; 3.4)       | ns             | 3.4 (3.2; 3.5)                            | 3.3 (3.2; 3.5)         | ns             | 3.0 (2.9; 3.2)    | ****           |
| FAS                                    | 0-9                       | 5.7 (5.5; 5.9)                        | 5.8 (5.5; 6.0)       | ns             | 6.4 (6.2; 6.5)                            | 6.4 (6.2; 6.6)         | ns             | 6.1 (5.9; 6.3)    | **             |

<sup>1</sup> P—significance level of Wilcoxon's test: \* $<0.05$ , \*\* $<0.01$ , \*\*\* $<0.001$ , \*\*\*\* $<0.0001$ ; nutrition knowledge score—evaluated based on 18 questions [22]; <sup>2</sup> in a group of 6-10-year-old children nutrition knowledge was assessed in their parents; pHDI—a pro-Healthy Diet Index composed of 4 questions (dairy products, fish, vegetables, fruit) [22]; nHDI—a non-Healthy Diet Index composed of 4 questions (fast food, sweetened soft drinks, energy drinks, sweets) [22]; screen time score—based on a single questions with 6 response categories [22]; physical activity score—based on two questions: physical activity at school and physical activity at leisure time [22]; FAS—the Family Affluence Scale composed of 6 questions [26]; <sup>3</sup> urban residents—respondents who indicated one of the following categories of place of residence: 'town' or 'city ( $\geq 100\ 000$  inhabitants)'; NA—not applied.
